# Supplementary material
Source: publisher figshare collection journal article supplement (https://frontiersin.figshare.com/ndownloader/files/13236851)
Supplement: Supplementary file [file 13236851]

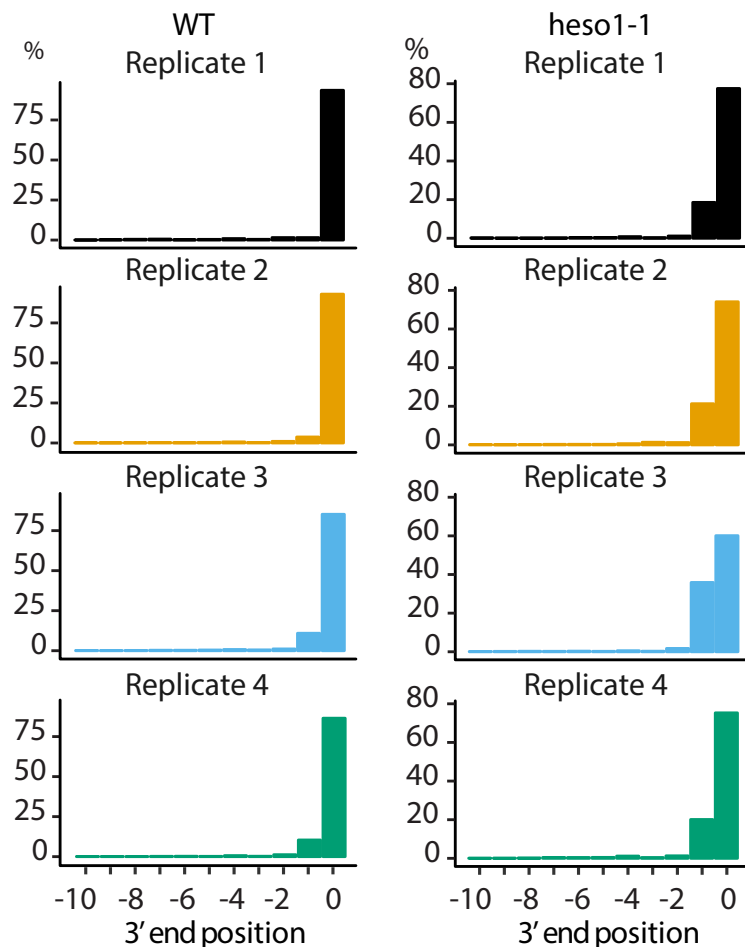

Supplementary Figure 5, related to Figure 8. Positions of 3' extremities of SPL13 5'-cleavage fragments mapped in a -10/0 window for four biological replicates in WT and heso1-1. Graphs are shown separately for each of the four replicates.
